# Supplementary material for: Thresholds for clinical practice that directly link handgrip strength to remaining years of life: estimates based on longitudinal observational data
Source: HighWire-hosted journal article supplement (doi:10.1136/bmjopen-2021-058489), 2022-07-01
Supplement: bmjopen-2021-058489supp001_data_supplement.pdf [file bmjopen-2021-058489supp001_data_supplement.pdf]

## SUPPLEMENTARY MATERIAL

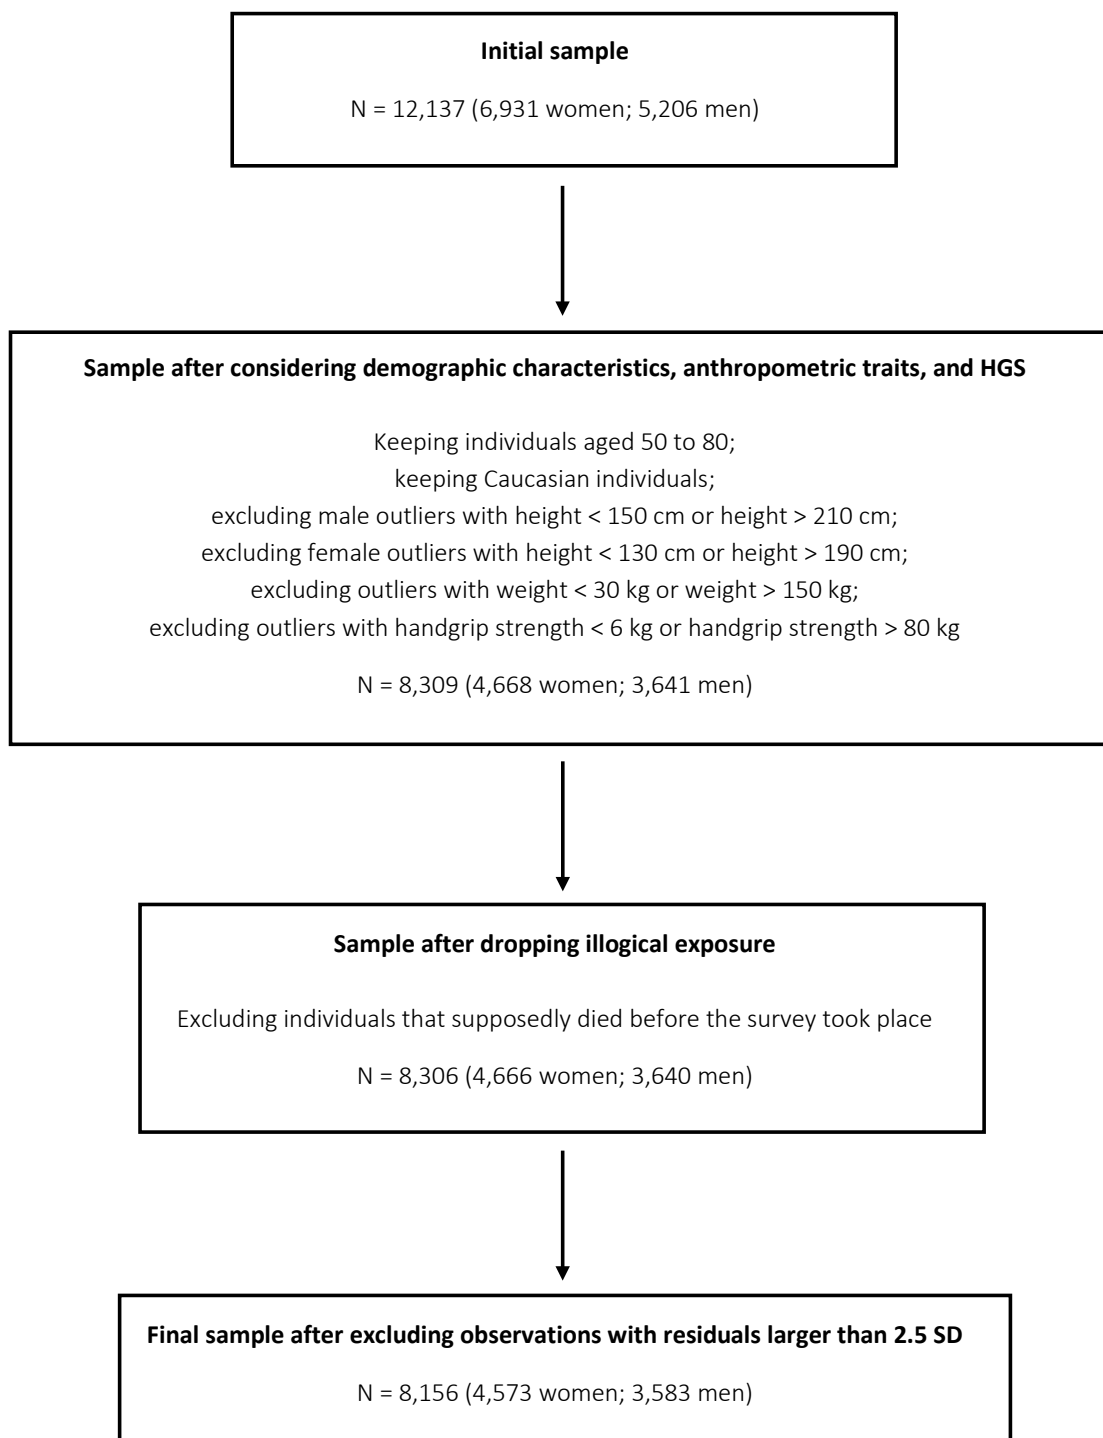

Figure A1: Sample construction

|                             | <b>Model 1<br/>(without education)</b> | <b>Model 2<br/>(with education)</b> |
|-----------------------------|----------------------------------------|-------------------------------------|
| <b>Men</b>                  |                                        |                                     |
| Reference: [0.0 SD, 0.5 SD) | 1.00 (reference)                       | 1.00 (reference)                    |
| Strong: [0.5 SD, 3.0 SD)    | 0.93 (0.69-1.25)                       | 0.93 (0.69-1.26)                    |
| Weak 1: [-0.5 SD, 0.0 SD)   | 1.67 (1.23-2.26)                       | 1.68 (1.24-2.27)                    |
| Weak 2: [-1.0 SD, -0.5 SD)  | 2.02 (1.49-2.75)                       | 1.98 (1.46-2.69)                    |
| Weak 3: [-2.0 SD, -1.0 SD)  | 2.40 (1.77-3.26)                       | 2.39 (1.76-3.25)                    |
| Weak 4: [-3.0 SD, -2.0 SD)  | 2.34 (1.40-3.93)                       | 2.32 (1.39-3.89)                    |
| Age in years                | 1.09 (1.07-1.10)                       | 1.09 (1.07-1.10)                    |
| Years of education          |                                        | 0.96 (0.93-0.98)                    |
| Max log likelihood          | -2358.9                                | -2353.0                             |
| LR test statistic           | 244.6                                  | 256.4                               |
| Total time at risk          | 21864                                  | 21864                               |
| Events                      | 529                                    | 529                                 |
| <b>Women</b>                |                                        |                                     |
| Reference: [0.0 SD, 0.5 SD) | 1.00 (reference)                       | 1.00 (reference)                    |
| Strong: [0.5 SD, 3.0 SD)    | 0.90 (0.66-1.22)                       | 0.89 (0.66-1.22)                    |
| Weak 1: [-0.5 SD, 0.0 SD)   | 1.32 (0.96-1.82)                       | 1.30 (0.94-1.79)                    |
| Weak 2: [-1.0 SD, -0.5 SD)  | 1.65 (1.20-2.28)                       | 1.62 (1.18-2.24)                    |
| Weak 3: [-2.0 SD, -1.0 SD)  | 1.85 (1.34-2.55)                       | 1.83 (1.32-2.53)                    |
| Weak 4: [-3.0 SD, -2.0 SD)  | 3.03 (1.83-5.04)                       | 2.98 (1.79-4.96)                    |
| Age in years                | 1.10 (1.08-1.12)                       | 1.10 (1.08-1.11)                    |
| Years of education          |                                        | 0.93 (0.90-0.96)                    |
| Max log likelihood          | -2192.8                                | -2181.7                             |
| LR test statistic           | 212.6                                  | 234.8                               |
| Total time at risk          | 28500                                  | 28500                               |
| Events                      | 449                                    | 449                                 |

95% CI in parentheses, years of education < 20 years

**Table A1: Hazard ratios for mortality by gender and st\_HGS group, with and without years of education as control**

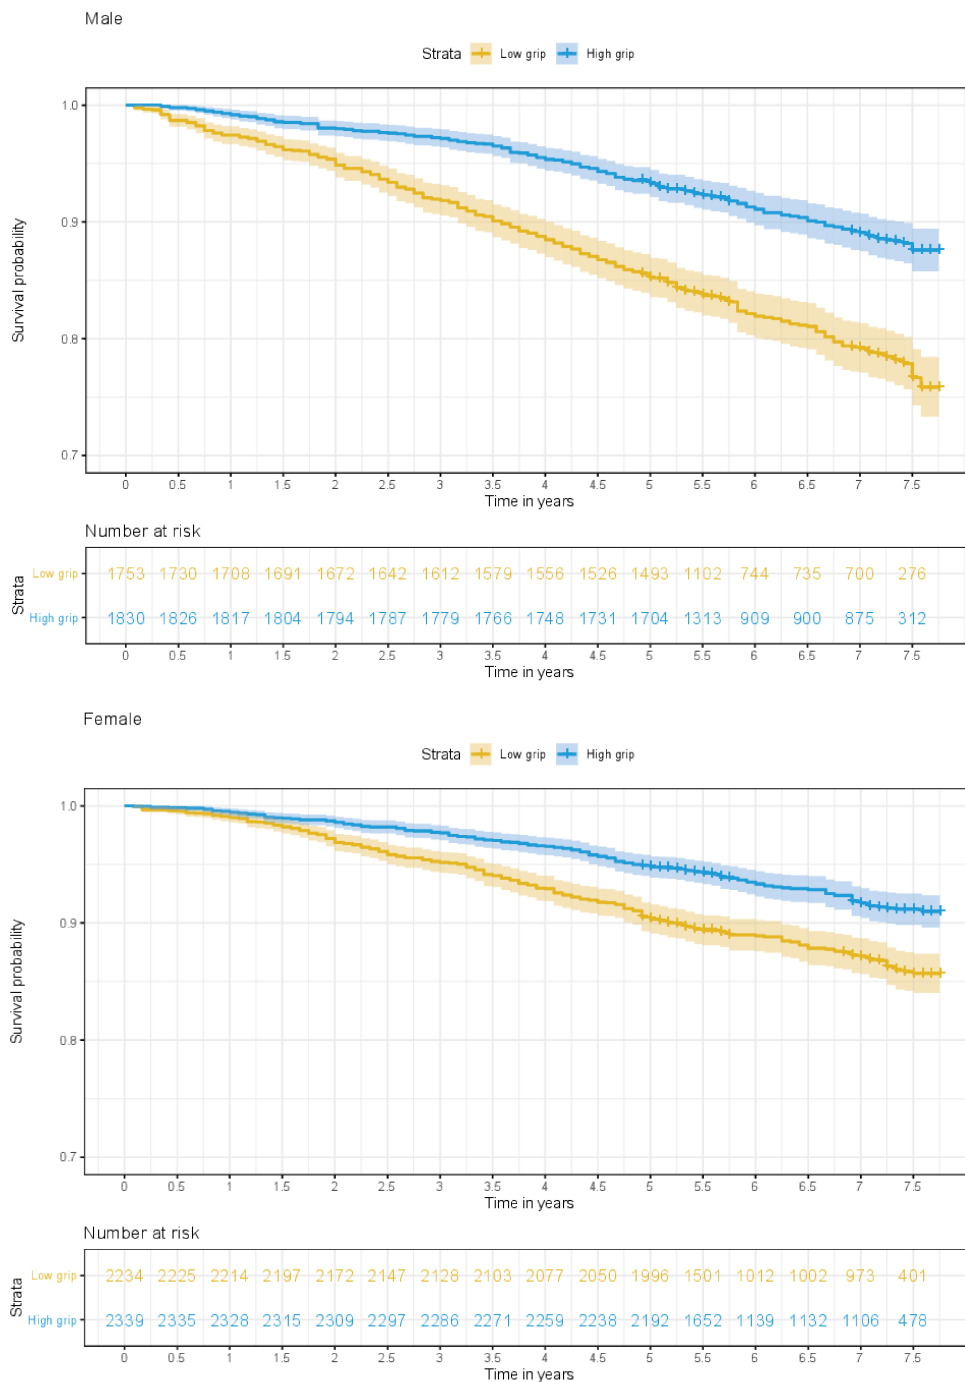

**Figure A2: Survival and numbers at risk, by gender and standardised handgrip strength**

“High grip” refers to the strong and reference group and “low grip” to groups Weak1-4
